# Supplementary material
Source: Royal Society of Chemistry journal article supplement (doi:10.1039/d6nj01605g)
Supplement: d6nj01605g1.pdf [file d6nj01605g1.pdf]

## Electronic supplementary information (ESI)

### Synthesis, structural and spectroscopic characterization of zinc(II) iodide complex with 2-[(4-iodophenyl)iminomethyl]pyridine in the solid state and solution

Krzysztof Łyczko,<sup>\*a</sup> Monika Łyczko,<sup>a</sup> Elżbieta Bednarek,<sup>b</sup> Mehdi Khalaj,<sup>c</sup> Karolina Węgrzyńska,<sup>b</sup> Anna Baraniak,<sup>b</sup> and Ingmar Persson<sup>d</sup>

<sup>a</sup>*Institute of Nuclear Chemistry and Technology, Dorodna 16, 03-195 Warsaw, Poland*

<sup>b</sup>*National Medicines Institute, Chelmska 30/34, 00-725 Warsaw, Poland*

<sup>c</sup>*Department of Chemistry, Buinzahra Branch, Islamic Azad University, Buinzahra, Iran*

<sup>d</sup>*Department of Molecular Sciences, Swedish University of Agricultural Sciences, P.O. Box 7015, SE-750 07 Uppsala, Sweden*

\*e-mail: k.lyczko@ichtj.waw.pl

## Legends

### Details of antibacterial studies

**Fig. S1.** IR spectrum of free  $L^{4-1}$  ligand.

**Fig. S2.** Experimental (black line) and simulated (red lines) IR spectra of  $[ZnI_2(L^{4-1})]$  complex.

**Table S1.**  $\pi\cdots\pi$  interactions for the studied complex (symmetry codes: (i)  $x, -y+0.5, z+0.5$ ).

**Table S2.** Calculated transitions for  $[ZnI_2(L^{4-1})]$  complex.

**Fig. S3.** UV-Vis spectra of  $[ZnI_2(L^{4-1})]$  complex, free  $L^{4-1}$  ligand, and  $ZnI_2$  in various solvents.

**Fig. S4.** Experimental (black) and TD-DFT/def2-TZVP/ECP(I)/IEFPCM(acetonitrile) simulated (red vertical lines) UV-Vis spectra of the  $[ZnI_2(L^{4-1})]$  complex (calculated data were scaled by a factor of 0.88).

**Fig. S5.** The  $^1H$  NMR spectrum of  $[ZnI_2(L^{4-1})]$  complex in  $CD_3CN$  (temp.  $25^\circ C$ ).

**Fig. S6.** The  $^{13}C$  NMR spectrum of  $[ZnI_2(L^{4-1})]$  complex in  $CD_3CN$  (temp.  $25^\circ C$ ).

**Fig. S7.** The  $^1H$ - $^{13}C$  HMBC spectrum of  $[ZnI_2(L^{4-1})]$  complex in  $CD_3CN$  (temp.  $25^\circ C$ ). The  $^1H$  and  $^{13}C$  NMR spectra of the  $[ZnI_2(L^{4-1})]$  complex are presented as projection spectra. The positions of the quaternary carbon atoms' signals: C2 (147.92 ppm), C1' (144.89 ppm), and C4' (96.65 ppm), which were not detected in the 1D  $^{13}C$  NMR spectrum, are marked by the arrows.

**Table S3.** The experimental  $^1H$  and  $^{13}C$  NMR chemical shifts  $\delta$  [ppm] for free  $L^{4-1}$  ligand and  $[ZnI_2(L^{4-1})]$  complex in  $CD_3CN$  (temp.  $25^\circ C$ , ref. to TMS, solvent:  $\delta$  ( $^1H$ ) 1.941 ppm,  $\delta$  ( $^{13}C$ ) 1.51 ppm, 118.48 ppm).

**Fig. S8.** XANES spectra of the  $[ZnI_2(L^{4-1})]$  complex registered in solid state (black line, no offset) and in various solvents: DMPU (brown line, offset 0.2),  $CH_2Cl_2$  (purple, offset 0.4), acetonitrile (blue line, offset 1.0), methanol (orange line, offset 1.3), water (green line, offset 1.6), and DMSO (red line offset 2.0).

**Table S4.** MICs/MBC values (mg/L) and zone diameters of bacterial growth inhibition (mm) obtained for test compounds and ciprofloxacin for reference strains.

### **Details of antibacterial studies**

The microdilution in broth and disk-diffusion methods were used to test the potency of the compounds. The minimum inhibitory concentrations (MICs) and minimum bactericidal concentrations (MBCs) were determined in the microdilution, while the inhibition zones of microbial growth were measured in the disk-diffusion method. The first assay consisted of preparing 2-fold dilutions of the substance in broth (from 512 mg/L to 0.5 mg/L), and the lowest concentration of the compound inhibiting visible bacterial growth was referred to as MIC, while the concentration causing inoculum death was called MBC. On the other hand, the second approach assessed the susceptibility of microorganisms to the tested compounds with a concentration of 5 µg in a disk. The obtained values were compared with those for ciprofloxacin, an antibiotic used in infections caused by all tested microbial species. The data interpretation for ciprofloxacin was performed using the European Committee on Antimicrobial Susceptibility Testing (EUCAST) guidelines (breakpoint tables for interpreting minimum inhibitory concentrations and zone diameters) [a].

[a] European Committee on Antimicrobial Susceptibility Testing. 2019. Breakpoints tables for interpretation of MICs and zone diameters. v 9.0. Available at <https://www.eucast.org>

**Fig. S1** IR spectrum of free  $L^{4-}$  ligand.

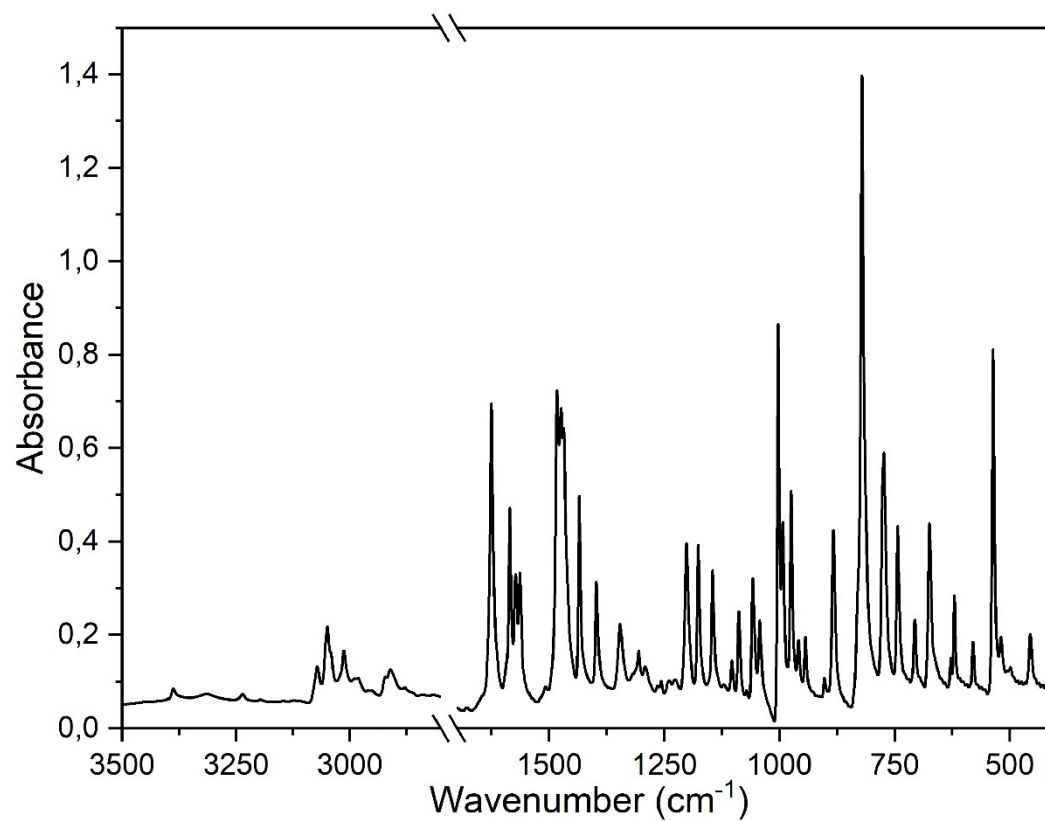

**Fig. S2** Experimental (black line) and simulated (red lines) IR spectra of  $[\text{ZnI}_2(L^{4-})]$  complex.

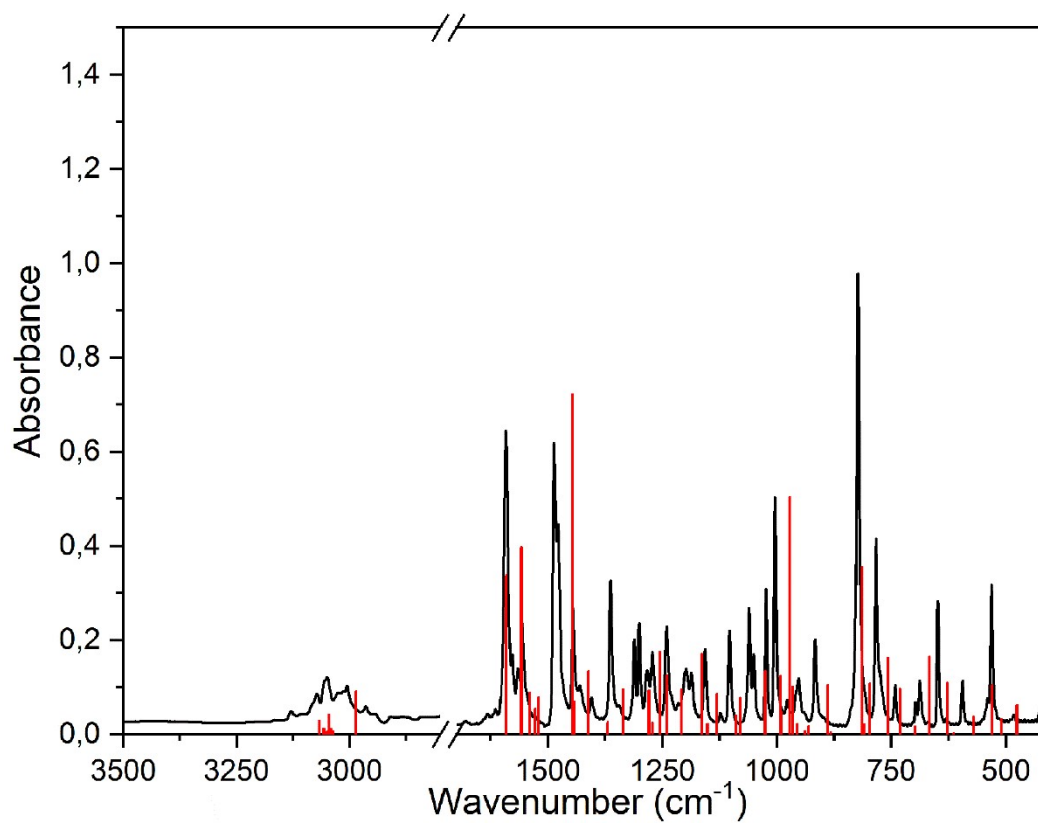

**Table S1.**  $\pi\cdots\pi$  interactions for the studied complex (symmetry codes: (i)  $x, -y+0.5, z+0.5$ ).

| interaction              | contact                      | distance (Å) |
|--------------------------|------------------------------|--------------|
| $\pi_{Ph}\cdots\pi_{py}$ | C7 $\cdots$ C3 <sup>i</sup>  | 3.372(5)     |
| $\pi_{Ph}\cdots\pi_{py}$ | C8 $\cdots$ C2 <sup>i</sup>  | 3.459(5)     |
| $\pi_{Ph}\cdots\pi_{py}$ | C8 $\cdots$ C1 <sup>i</sup>  | 3.628(5)     |
| $\pi_{Ph}\cdots\pi_{py}$ | C9 $\cdots$ N1 <sup>i</sup>  | 3.581(5)     |
| $\pi_{Ph}\cdots\pi_{py}$ | C10 $\cdots$ C5 <sup>i</sup> | 3.611(6)     |
| $\pi_{Ph}\cdots\pi_{py}$ | C11 $\cdots$ C4 <sup>i</sup> | 3.667(6)     |
| $\pi_{Ph}\cdots\pi_{py}$ | C12 $\cdots$ C4 <sup>i</sup> | 3.619(5)     |

**Table S2.** Calculated transitions for [ZnI<sub>2</sub>(pyCNPhI)] complex.

| Wavelength [nm] | Oscillator strength | Main components             | %     |
|-----------------|---------------------|-----------------------------|-------|
| 436.71          | 0.0005              | HOMO $\rightarrow$ LUMO     | 99.93 |
| 420.75          | 0.0091              | HOMO-1 $\rightarrow$ LUMO   | 84.57 |
|                 |                     | HOMO-2 $\rightarrow$ LUMO   | 14.81 |
| 412.42          | 0.0704              | HOMO-2 $\rightarrow$ LUMO   | 54.17 |
|                 |                     | HOMO-4 $\rightarrow$ LUMO   | 22.55 |
|                 |                     | HOMO-3 $\rightarrow$ LUMO   | 15.93 |
|                 |                     | HOMO-1 $\rightarrow$ LUMO   | 6.65  |
| 407.04          | 0.0110              | HOMO-3 $\rightarrow$ LUMO   | 70.65 |
|                 |                     | HOMO-4 $\rightarrow$ LUMO   | 27.73 |
| 391.40          | 0.3832              | HOMO-4 $\rightarrow$ LUMO   | 49.16 |
|                 |                     | HOMO-2 $\rightarrow$ LUMO   | 29.00 |
|                 |                     | HOMO-3 $\rightarrow$ LUMO   | 12.67 |
|                 |                     | HOMO-1 $\rightarrow$ LUMO   | 8.02  |
| 345.77          | 0.0593              | HOMO-5 $\rightarrow$ LUMO   | 99.08 |
| 317.26          | 0.0020              | HOMO-6 $\rightarrow$ LUMO   | 98.97 |
| 315.11          | 0.0080              | HOMO-7 $\rightarrow$ LUMO   | 96.34 |
| 297.45          | 0.0065              | HOMO-9 $\rightarrow$ LUMO   | 89.62 |
|                 |                     | HOMO-8 $\rightarrow$ LUMO   | 8.52  |
| 290.41          | 0.0002              | HOMO $\rightarrow$ LUMO+1   | 99.76 |
| 287.00          | 0.1727              | HOMO-8 $\rightarrow$ LUMO   | 83.98 |
|                 |                     | HOMO-9 $\rightarrow$ LUMO   | 8.13  |
| 283.32          | 0.0005              | HOMO-1 $\rightarrow$ LUMO+1 | 84.48 |
|                 |                     | HOMO-2 $\rightarrow$ LUMO+1 | 14.80 |
| 279.32          | 0.0038              | HOMO-3 $\rightarrow$ LUMO+1 | 48.91 |
|                 |                     | HOMO-2 $\rightarrow$ LUMO+1 | 41.50 |
|                 |                     | HOMO-1 $\rightarrow$ LUMO+1 | 4.81  |
|                 |                     | HOMO-4 $\rightarrow$ LUMO+1 | 2.05  |
| 277.30          | 0.0165              | HOMO-3 $\rightarrow$ LUMO+1 | 34.46 |

|        |        |                 |       |
|--------|--------|-----------------|-------|
|        |        | HOMO-4 → LUMO+1 | 21.53 |
|        |        | HOMO-2 → LUMO+1 | 15.84 |
|        |        | HOMO-2 → LUMO+2 | 10.07 |
|        |        | HOMO-1 → LUMO+2 | 4.26  |
|        |        | HOMO-1 → LUMO+1 | 3.04  |
| 276.67 | 0.0021 | HOMO-2 → LUMO+2 | 44.91 |
|        |        | HOMO-1 → LUMO+2 | 19.46 |
|        |        | HOMO-4 → LUMO+1 | 11.94 |
|        |        | HOMO-4 → LUMO+2 | 7.77  |
|        |        | HOMO-3 → LUMO+2 | 5.71  |
|        |        | HOMO-2 → LUMO+1 | 1.82  |
|        |        | HOMO-3 → LUMO+1 | 1.53  |
| 271.41 | 0.0409 | HOMO-4 → LUMO+1 | 56.96 |
|        |        | HOMO-3 → LUMO+1 | 11.71 |
|        |        | HOMO-2 → LUMO+1 | 11.28 |
|        |        | HOMO-1 → LUMO+1 | 5.39  |
|        |        | HOMO-10 → LUMO  | 2.62  |
| 269.19 | 0.1637 | HOMO-10 → LUMO  | 65.37 |
|        |        | HOMO-12 → LUMO  | 19.48 |
|        |        | HOMO-11 → LUMO  | 3.12  |
|        |        | HOMO-2 → LUMO+1 | 2.97  |
|        |        | HOMO-8 → LUMO   | 2.87  |
| 251.69 | 0.0144 | HOMO-2 → LUMO+3 | 48.32 |
|        |        | HOMO-1 → LUMO+3 | 28.81 |
|        |        | HOMO-7 → LUMO+4 | 7.24  |
|        |        | HOMO-4 → LUMO+3 | 3.79  |
|        |        | HOMO-3 → LUMO+3 | 3.25  |
|        |        | HOMO-7 → LUMO+1 | 2.97  |
|        |        | HOMO-7 → LUMO   | 2.49  |
| 249.13 | 0.0121 | HOMO → LUMO+3   | 68.58 |
|        |        | HOMO → LUMO+2   | 22.96 |
|        |        | HOMO → LUMO+4   | 4.44  |
|        |        | HOMO → LUMO+5   | 2.49  |
| 248.01 | 0.0261 | HOMO-5 → LUMO+1 | 47.63 |
|        |        | HOMO-12 → LUMO  | 2.03  |
| 247.80 | 0.0006 | HOMO → LUMO+2   | 70.45 |
|        |        | HOMO → LUMO+3   | 26.89 |
| 244.90 | 0.0028 | HOMO-1 → LUMO+3 | 46.37 |
|        |        | HOMO-2 → LUMO+3 | 22.45 |
|        |        | HOMO-1 → LUMO+2 | 10.59 |
|        |        | HOMO-1 → LUMO+5 | 4.84  |
|        |        | HOMO-2 → LUMO+2 | 3.90  |
|        |        | HOMO-2 → LUMO+4 | 2.49  |
|        |        | HOMO-1 → LUMO+4 | 2.31  |
| 244.55 | 0.0173 | HOMO-11 → LUMO  | 41.61 |
|        |        | HOMO-12 → LUMO  | 23.75 |
|        |        | HOMO-10 → LUMO  | 12.70 |
|        |        | HOMO-2 → LUMO+4 | 5.54  |
|        |        | HOMO-1 → LUMO+4 | 3.45  |
|        |        | HOMO-8 → LUMO+1 | 3.19  |
| 242.97 | 0.0160 | HOMO → LUMO+4   | 78.47 |
|        |        | HOMO → LUMO+5   | 5.89  |

|        |        |                  |       |
|--------|--------|------------------|-------|
|        |        | HOMO → LUMO+2    | 4.92  |
|        |        | HOMO-1 → LUMO+2  | 3.08  |
|        |        | HOMO → LUMO+3    | 2.25  |
| 242.69 | 0.0056 | HOMO-1 → LUMO+2  | 51.37 |
|        |        | HOMO-2 → LUMO+2  | 19.08 |
|        |        | HOMO-1 → LUMO+3  | 12.03 |
|        |        | HOMO-2 → LUMO+3  | 5.63  |
|        |        | HOMO → LUMO+4    | 5.60  |
|        |        | HOMO-6 → LUMO+2  | 3.22  |
| 240.80 | 0.0003 | HOMO-6 → LUMO+2  | 92.77 |
| 240.01 | 0.0174 | HOMO-3 → LUMO+3  | 30.36 |
|        |        | HOMO-4 → LUMO+3  | 27.24 |
|        |        | HOMO-3 → LUMO+2  | 7.36  |
|        |        | HOMO-2 → LUMO+3  | 6.11  |
|        |        | HOMO-2 → LUMO+4  | 5.32  |
|        |        | HOMO-4 → LUMO+2  | 4.61  |
|        |        | HOMO-2 → LUMO+2  | 2.94  |
|        |        | HOMO-3 → LUMO+4  | 2.66  |
|        |        | HOMO-1 → LUMO+4  | 2.57  |
|        |        | HOMO-3 → LUMO+5  | 2.25  |
| 239.10 | 0.0178 | HOMO-4 → LUMO+3  | 43.11 |
|        |        | HOMO-3 → LUMO+3  | 19.91 |
|        |        | HOMO-3 → LUMO+2  | 8.69  |
|        |        | HOMO-1 → LUMO+4  | 5.71  |
|        |        | HOMO-3 → LUMO+4  | 4.49  |
|        |        | HOMO-4 → LUMO+2  | 3.28  |
|        |        | HOMO-3 → LUMO+5  | 2.99  |
|        |        | HOMO-4 → LUMO+4  | 2.49  |
| 238.47 | 0.0016 | HOMO-1 → LUMO+4  | 55.76 |
|        |        | HOMO-2 → LUMO+4  | 12.56 |
|        |        | HOMO-1 → LUMO+5  | 5.79  |
|        |        | HOMO-1 → LUMO+2  | 4.95  |
|        |        | HOMO-3 → LUMO+3  | 3.96  |
|        |        | HOMO-3 → LUMO+2  | 3.66  |
|        |        | HOMO-4 → LUMO+3  | 3.47  |
|        |        | HOMO-1 → LUMO+3  | 3.44  |
|        |        | HOMO-2 → LUMO+3  | 2.31  |
|        |        | HOMO-2 → LUMO+5  | 2.02  |
| 237.94 | 0.0125 | HOMO-3 → LUMO+2  | 34.68 |
|        |        | HOMO-3 → LUMO+3  | 24.94 |
|        |        | HOMO-4 → LUMO+2  | 19.75 |
|        |        | HOMO-2 → LUMO+2  | 10.48 |
| 236.99 | 0.0014 | HOMO-4 → LUMO+2  | 51.53 |
|        |        | HOMO-3 → LUMO+2  | 18.69 |
|        |        | HOMO-4 → LUMO+3  | 10.26 |
|        |        | HOMO-3 → LUMO+3  | 7.80  |
| 236.69 | 0.0619 | HOMO-2 → LUMO+4  | 26.49 |
|        |        | HOMO-11 → LUMO   | 22.77 |
|        |        | HOMO-12 → LUMO   | 16.41 |
|        |        | HOMO-3 → LUMO+2  | 12.56 |
|        |        | HOMO-8 → LUMO+1  | 7.05  |
|        |        | HOMO-10 → LUMO+1 | 2.70  |

|                 |        |                 |        |                 |       |
|-----------------|--------|-----------------|--------|-----------------|-------|
| 234.52          | 0.0131 | HOMO-4 → LUMO+4 | 24.86  |                 |       |
|                 |        | HOMO-12 → LUMO  | 16.04  |                 |       |
|                 |        | HOMO-2 → LUMO+4 | 15.13  |                 |       |
|                 |        | HOMO-4 → LUMO+2 | 6.25   |                 |       |
|                 |        | HOMO-1 → LUMO+4 | 5.58   |                 |       |
|                 |        | HOMO-4 → LUMO+3 | 4.44   |                 |       |
|                 |        | HOMO-11 → LUMO  | 4.23   |                 |       |
|                 |        | HOMO-10 → LUMO  | 4.17   |                 |       |
|                 |        | HOMO-3 → LUMO+4 | 4.12   |                 |       |
|                 |        | HOMO-4 → LUMO+5 | 3.53   |                 |       |
|                 |        | HOMO-2 → LUMO+5 | 2.35   |                 |       |
|                 |        | HOMO-8 → LUMO+1 | 2.01   |                 |       |
|                 |        | 233.28          | 0.0237 | HOMO-3 → LUMO+4 | 63.72 |
|                 |        |                 |        | HOMO-4 → LUMO+4 | 10.52 |
| HOMO → LUMO+5   | 4.58   |                 |        |                 |       |
| HOMO-3 → LUMO+2 | 4.47   |                 |        |                 |       |
| HOMO-3 → LUMO+5 | 3.84   |                 |        |                 |       |
| HOMO-3 → LUMO+3 | 3.41   |                 |        |                 |       |
| HOMO-4 → LUMO+2 | 2.54   |                 |        |                 |       |
| 232.18          | 0.0700 | HOMO → LUMO+5   | 81.07  |                 |       |
|                 |        | HOMO → LUMO+4   | 7.10   |                 |       |
|                 |        | HOMO-3 → LUMO+4 | 4.63   |                 |       |
| 229.76          | 0.0008 | HOMO-6 → LUMO+1 | 93.08  |                 |       |
|                 |        | HOMO-6 → LUMO+4 | 4.33   |                 |       |
| 229.36          | 0.0060 | HOMO-1 → LUMO+5 | 34.07  |                 |       |
|                 |        | HOMO-4 → LUMO+4 | 22.96  |                 |       |
|                 |        | HOMO-1 → LUMO+4 | 14.02  |                 |       |
|                 |        | HOMO-2 → LUMO+5 | 10.89  |                 |       |
|                 |        | HOMO-12 → LUMO  | 4.02   |                 |       |
|                 |        | HOMO-10 → LUMO  | 2.70   |                 |       |
|                 |        | HOMO-3 → LUMO+4 | 2.02   |                 |       |
| 229.17          | 0.0286 | HOMO-1 → LUMO+5 | 31.94  |                 |       |
|                 |        | HOMO-4 → LUMO+4 | 25.96  |                 |       |
|                 |        | HOMO-2 → LUMO+4 | 18.91  |                 |       |
|                 |        | HOMO-2 → LUMO+5 | 4.89   |                 |       |
|                 |        | HOMO-3 → LUMO+4 | 4.83   |                 |       |
|                 |        | HOMO-12 → LUMO  | 4.06   |                 |       |
|                 |        | HOMO-10 → LUMO  | 2.94   |                 |       |
| 224.74          | 0.0433 | HOMO-3 → LUMO+5 | 42.76  |                 |       |
|                 |        | HOMO-2 → LUMO+5 | 20.24  |                 |       |
|                 |        | HOMO-4 → LUMO+5 | 12.59  |                 |       |
|                 |        | HOMO-7 → LUMO+1 | 6.88   |                 |       |
|                 |        | HOMO-3 → LUMO+4 | 5.45   |                 |       |
|                 |        | HOMO-1 → LUMO+5 | 3.08   |                 |       |
|                 |        | HOMO-2 → LUMO+4 | 2.90   |                 |       |
| 224.46          | 0.0227 | HOMO-7 → LUMO+1 | 76.90  |                 |       |
|                 |        | HOMO-7 → LUMO+2 | 8.41   |                 |       |
|                 |        | HOMO-3 → LUMO+5 | 4.27   |                 |       |
|                 |        | HOMO-9 → LUMO+1 | 2.43   |                 |       |
| 223.53          | 0.0664 | HOMO-4 → LUMO+5 | 54.24  |                 |       |
|                 |        | HOMO-3 → LUMO+5 | 27.27  |                 |       |
|                 |        | HOMO-4 → LUMO+4 | 4.68   |                 |       |

|        |        |                  |       |
|--------|--------|------------------|-------|
|        |        | HOMO-2 → LUMO+5  | 3.52  |
|        |        | HOMO-3 → LUMO+4  | 3.22  |
| 223.09 | 0.0014 | HOMO-7 → LUMO+2  | 89.23 |
|        |        | HOMO-7 → LUMO+1  | 7.59  |
| 221.33 | 0.0041 | HOMO-9 → LUMO+1  | 85.12 |
|        |        | HOMO-7 → LUMO+1  | 3.48  |
|        |        | HOMO-10 → LUMO+1 | 2.34  |
|        |        | HOMO-8 → LUMO+1  | 2.14  |
| 219.96 | 0.0007 | HOMO-6 → LUMO+3  | 98.27 |
| 216.78 | 0.0233 | HOMO-5 → LUMO+3  | 92.43 |
|        |        | HOMO-5 → LUMO+2  | 5.54  |
| 216.09 | 0.0088 | HOMO-5 → LUMO+2  | 80.68 |
|        |        | HOMO-5 → LUMO+3  | 5.74  |
|        |        | HOMO-5 → LUMO+4  | 4.27  |
|        |        | HOMO-8 → LUMO+1  | 3.25  |
|        |        | HOMO-8 → LUMO+2  | 2.72  |
| 214.08 | 0.0516 | HOMO-8 → LUMO+1  | 49.62 |
|        |        | HOMO-5 → LUMO+4  | 17.05 |
|        |        | HOMO-5 → LUMO+2  | 8.15  |
|        |        | HOMO-11 → LUMO   | 7.62  |
|        |        | HOMO-2 → LUMO+5  | 2.63  |
|        |        | HOMO-10 → LUMO+1 | 2.23  |
| 213.24 | 0.0043 | HOMO-2 → LUMO+5  | 45.23 |
|        |        | HOMO-4 → LUMO+5  | 17.46 |
|        |        | HOMO-1 → LUMO+5  | 14.63 |
|        |        | HOMO-3 → LUMO+5  | 11.26 |
|        |        | HOMO-8 → LUMO+1  | 2.22  |
| 211.69 | 0.0331 | HOMO-5 → LUMO+4  | 54.94 |
|        |        | HOMO-8 → LUMO+2  | 8.65  |
|        |        | HOMO-13 → LUMO   | 7.84  |
|        |        | HOMO-14 → LUMO   | 7.48  |
|        |        | HOMO-8 → LUMO+1  | 7.22  |
|        |        | HOMO-10 → LUMO+1 | 4.13  |
|        |        | HOMO-15 → LUMO   | 2.08  |
| 210.43 | 0.0010 | HOMO-6 → LUMO+4  | 88.52 |
|        |        | HOMO-6 → LUMO+1  | 4.67  |
|        |        | HOMO-6 → LUMO+6  | 2.96  |
| 210.28 | 0.0052 | HOMO-8 → LUMO+2  | 70.35 |
|        |        | HOMO-10 → LUMO+2 | 9.78  |
|        |        | HOMO-5 → LUMO+4  | 4.41  |
|        |        | HOMO-5 → LUMO+2  | 4.23  |
| 209.52 | 0.0488 | HOMO-13 → LUMO   | 45.27 |
|        |        | HOMO-14 → LUMO   | 14.57 |
|        |        | HOMO-5 → LUMO+4  | 13.21 |
|        |        | HOMO-8 → LUMO+1  | 9.90  |
|        |        | HOMO-15 → LUMO   | 8.83  |
| 204.94 | 0.0127 | HOMO → LUMO+6    | 79.96 |
|        |        | HOMO-13 → LUMO   | 7.28  |
|        |        | HOMO-14 → LUMO   | 5.98  |
| 204.85 | 0.0436 | HOMO-13 → LUMO   | 25.29 |
|        |        | HOMO-14 → LUMO   | 23.89 |
|        |        | HOMO → LUMO+6    | 17.04 |

|        |        |                  |       |
|--------|--------|------------------|-------|
|        |        | HOMO-8 → LUMO+3  | 7.89  |
|        |        | HOMO-7 → LUMO+4  | 5.74  |
|        |        | HOMO-2 → LUMO+6  | 3.66  |
|        |        | HOMO-15 → LUMO   | 2.81  |
|        |        | HOMO-10 → LUMO+1 | 2.29  |
| 204.64 | 0.0266 | HOMO-8 → LUMO+3  | 47.07 |
|        |        | HOMO-7 → LUMO+4  | 26.84 |
|        |        | HOMO-13 → LUMO   | 6.12  |
|        |        | HOMO-10 → LUMO+3 | 5.17  |
|        |        | HOMO-14 → LUMO   | 3.10  |
| 202.84 | 0.0321 | HOMO-10 → LUMO+1 | 34.05 |
|        |        | HOMO-1 → LUMO+6  | 23.50 |
|        |        | HOMO-12 → LUMO+1 | 10.99 |
|        |        | HOMO-2 → LUMO+6  | 5.95  |
|        |        | HOMO-11 → LUMO+1 | 5.25  |
|        |        | HOMO-14 → LUMO   | 3.72  |
|        |        | HOMO-9 → LUMO+1  | 3.39  |
| 201.45 | 0.0298 | HOMO-1 → LUMO+6  | 62.56 |
|        |        | HOMO-10 → LUMO+1 | 11.41 |
|        |        | HOMO-14 → LUMO   | 9.05  |
|        |        | HOMO-12 → LUMO+1 | 4.32  |
|        |        | HOMO-15 → LUMO   | 2.46  |
| 200.92 | 0.0302 | HOMO-2 → LUMO+6  | 72.12 |
|        |        | HOMO-5 → LUMO+5  | 9.20  |
|        |        | HOMO-1 → LUMO+6  | 7.19  |
|        |        | HOMO-15 → LUMO   | 3.51  |
|        |        | HOMO-14 → LUMO   | 2.18  |
| 198.84 | 0.3207 | HOMO-5 → LUMO+5  | 65.98 |
|        |        | HOMO-4 → LUMO+6  | 10.76 |
|        |        | HOMO-2 → LUMO+6  | 7.30  |
|        |        | HOMO-1 → LUMO+7  | 3.05  |
| 198.34 | 0.0079 | HOMO-3 → LUMO+6  | 90.65 |
|        |        | HOMO-15 → LUMO   | 3.42  |
| 197.43 | 0.1794 | HOMO-4 → LUMO+6  | 42.77 |
|        |        | HOMO-7 → LUMO+3  | 13.76 |
|        |        | HOMO-15 → LUMO   | 9.81  |
|        |        | HOMO-5 → LUMO+5  | 9.34  |
|        |        | HOMO-8 → LUMO+4  | 9.10  |
|        |        | HOMO-14 → LUMO   | 4.43  |
|        |        | HOMO-3 → LUMO+6  | 3.00  |
| 197.05 | 0.1723 | HOMO-7 → LUMO+3  | 38.85 |
|        |        | HOMO-4 → LUMO+6  | 32.14 |
|        |        | HOMO-8 → LUMO+4  | 16.11 |
|        |        | HOMO-7 → LUMO+4  | 2.20  |
| 194.34 | 0.0026 | HOMO-15 → LUMO   | 43.46 |
|        |        | HOMO-14 → LUMO   | 14.57 |
|        |        | HOMO-16 → LUMO   | 11.64 |
|        |        | HOMO-8 → LUMO+4  | 9.15  |
|        |        | HOMO-4 → LUMO+6  | 7.86  |
|        |        | HOMO-11 → LUMO+1 | 2.64  |
| 193.77 | 0.0162 | HOMO-9 → LUMO+3  | 92.13 |
| 192.94 | 0.1108 | HOMO-8 → LUMO+3  | 37.43 |

|        |        |                  |       |
|--------|--------|------------------|-------|
|        |        | HOMO-7 → LUMO+4  | 37.06 |
|        |        | HOMO-10 → LUMO+3 | 5.78  |
|        |        | HOMO-9 → LUMO+2  | 4.69  |
|        |        | HOMO-8 → LUMO+4  | 2.90  |
|        |        | HOMO-2 → LUMO+3  | 2.14  |
| 192.34 | 0.0695 | HOMO-9 → LUMO+2  | 65.41 |
|        |        | HOMO-9 → LUMO+4  | 11.87 |
|        |        | HOMO-7 → LUMO+3  | 3.32  |
|        |        | HOMO-8 → LUMO+4  | 3.14  |
|        |        | HOMO-8 → LUMO+3  | 2.82  |
|        |        | HOMO-9 → LUMO+3  | 2.82  |
|        |        | HOMO-7 → LUMO+4  | 2.58  |
| 191.10 | 0.1288 | HOMO-8 → LUMO+4  | 26.67 |
|        |        | HOMO-9 → LUMO+2  | 22.16 |
|        |        | HOMO-12 → LUMO+1 | 15.62 |
|        |        | HOMO-9 → LUMO+4  | 12.39 |
|        |        | HOMO-7 → LUMO+3  | 8.37  |
|        |        | HOMO-16 → LUMO   | 3.22  |
|        |        | HOMO-10 → LUMO+1 | 3.19  |
| 189.64 | 0.0476 | HOMO-9 → LUMO+4  | 63.41 |
|        |        | HOMO-12 → LUMO+1 | 10.07 |
|        |        | HOMO-8 → LUMO+4  | 5.18  |
|        |        | HOMO-9 → LUMO+2  | 4.79  |
|        |        | HOMO-16 → LUMO   | 3.86  |
|        |        | HOMO-7 → LUMO+3  | 2.79  |
|        |        | HOMO-11 → LUMO+1 | 2.02  |
| 188.54 | 0.2109 | HOMO-12 → LUMO+1 | 31.06 |
|        |        | HOMO-10 → LUMO+1 | 20.53 |
|        |        | HOMO-11 → LUMO+1 | 11.58 |
|        |        | HOMO-16 → LUMO   | 8.22  |
|        |        | HOMO-7 → LUMO+3  | 6.80  |
|        |        | HOMO-8 → LUMO+4  | 6.41  |
|        |        | HOMO-5 → LUMO+6  | 3.81  |

**Fig. S3.** UV-Vis spectra of  $[\text{ZnI}_2(\text{L}^{4-})]$  complex, free  $\text{L}^{4-}$  ligand, and  $\text{ZnI}_2$  in various solvents.

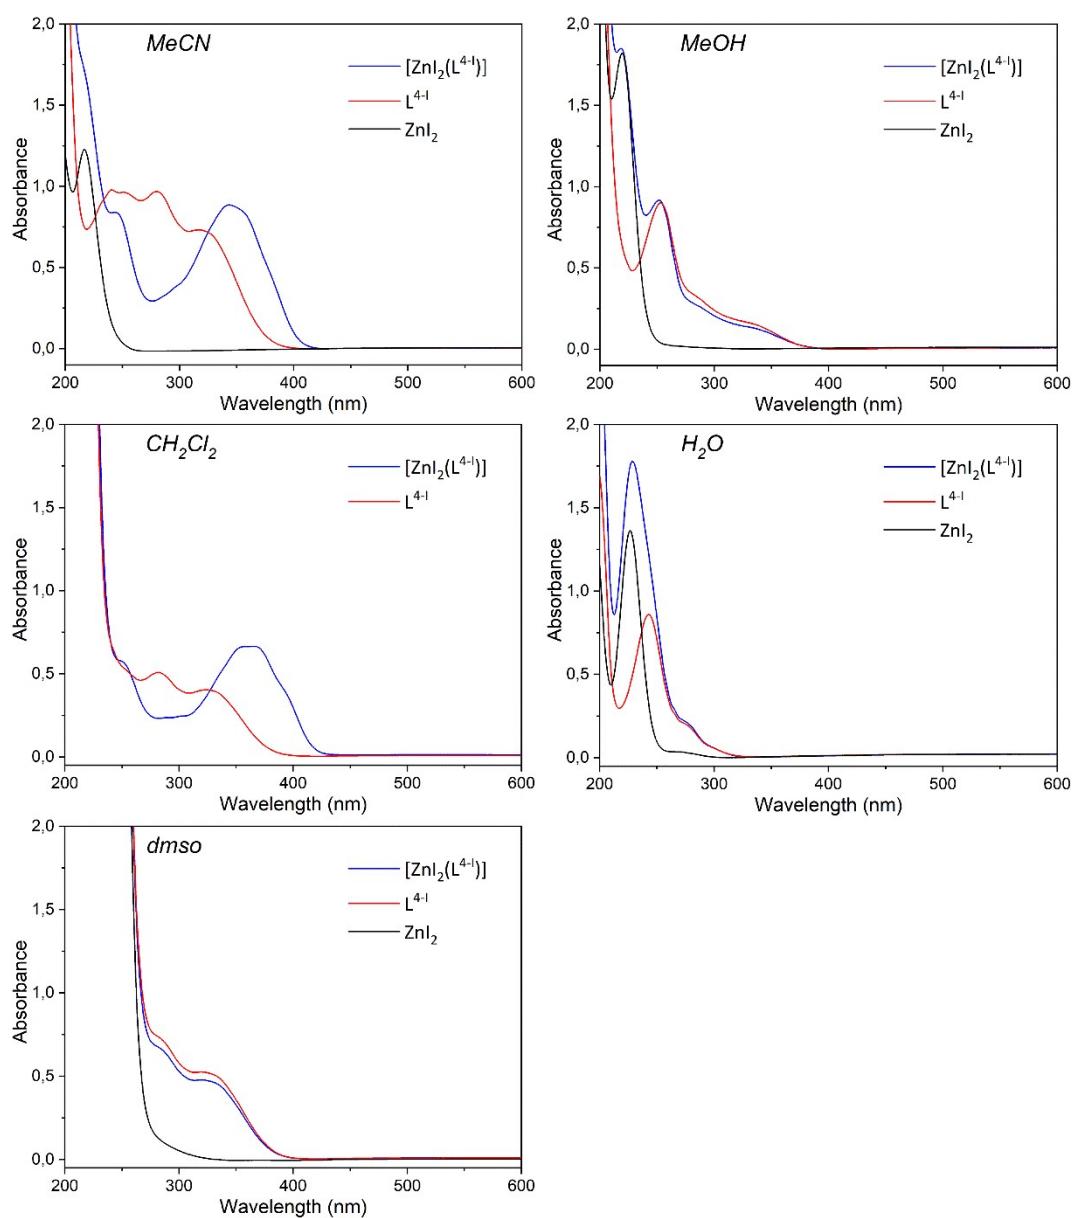

**Fig. S4.** Experimental (black) and TD-DFT/def2-TZVP/ECP(I)/IEFPCM(acetonitrile) simulated (red vertical lines) UV-Vis spectra of the  $[\text{ZnI}_2(\text{L}^{4-})]$  complex (calculated data were scaled by a factor of 0.88).

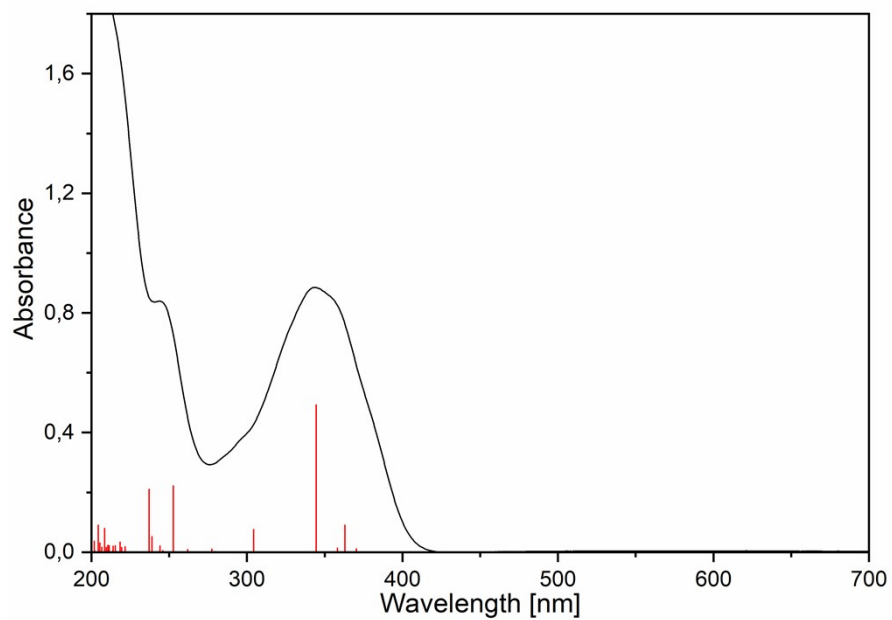

**Fig. S5.** The  $^1\text{H}$  NMR spectrum of  $[\text{ZnI}_2(\text{L}^{4-})]$  complex in  $\text{CD}_3\text{CN}$  ( $25\text{ }^\circ\text{C}$ ).

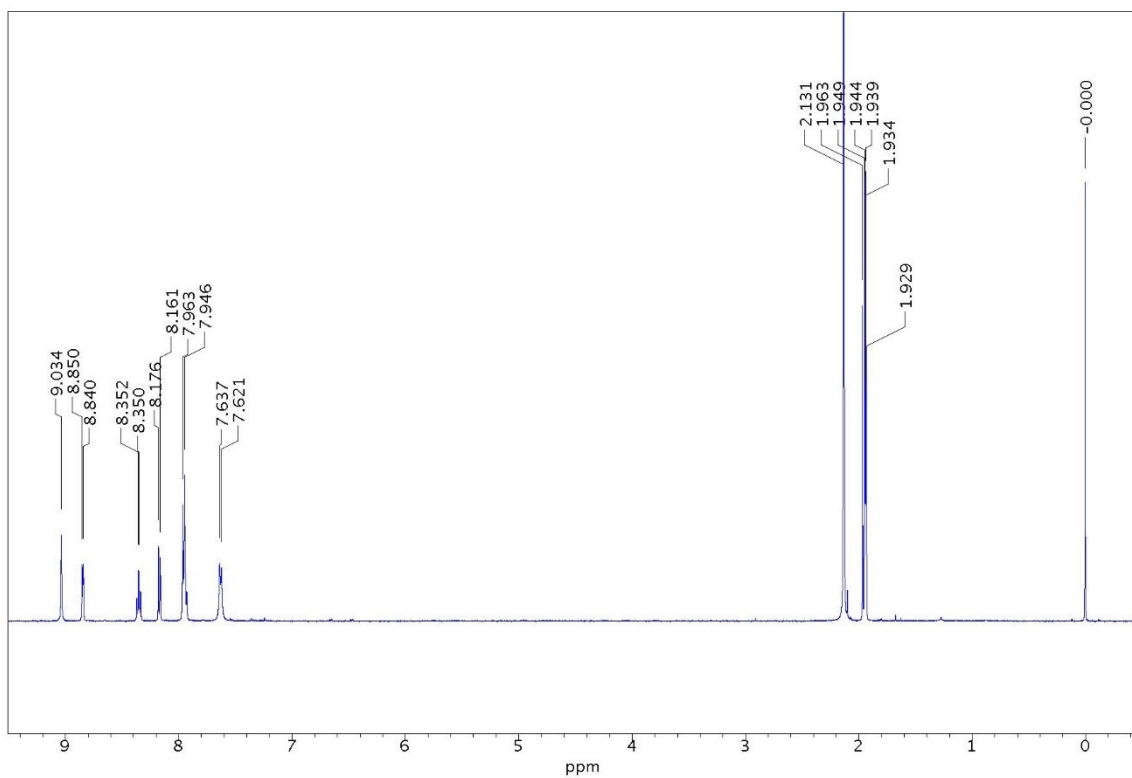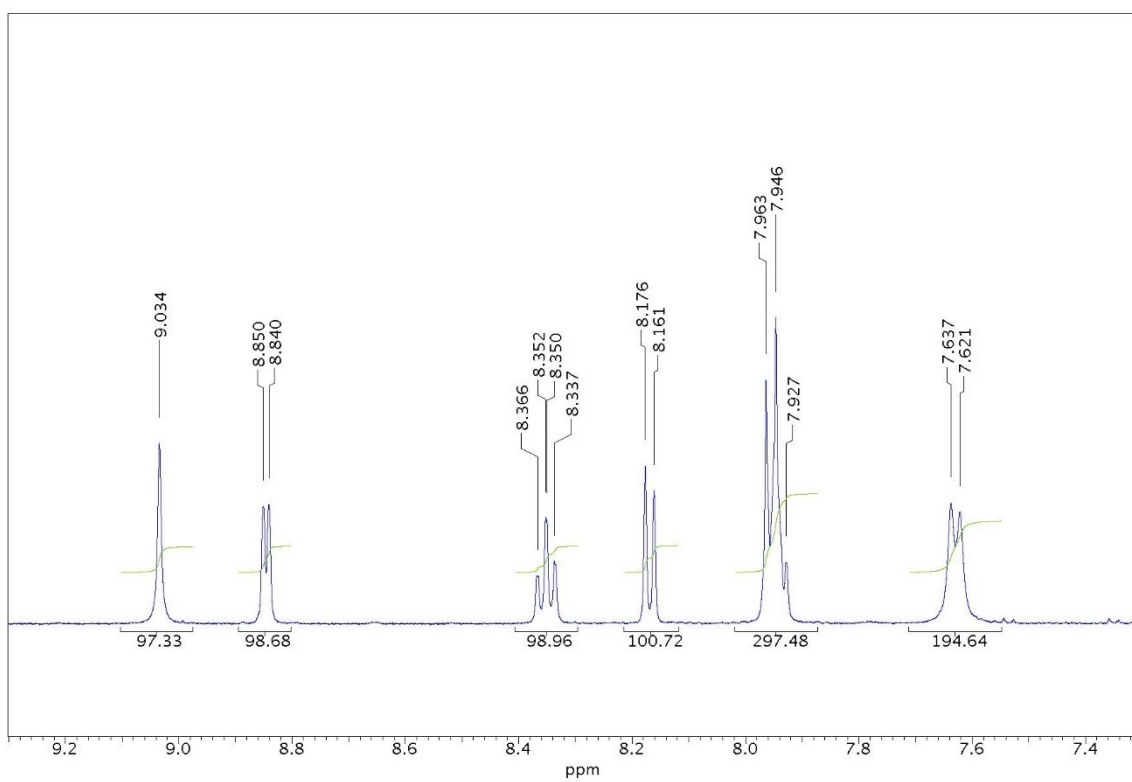

**Fig. S6.** The  $^{13}\text{C}$  NMR spectrum of  $[\text{ZnI}_2(\text{L}^{4-1})]$  complex in  $\text{CD}_3\text{CN}$  (temp.  $25\text{ }^\circ\text{C}$ ).

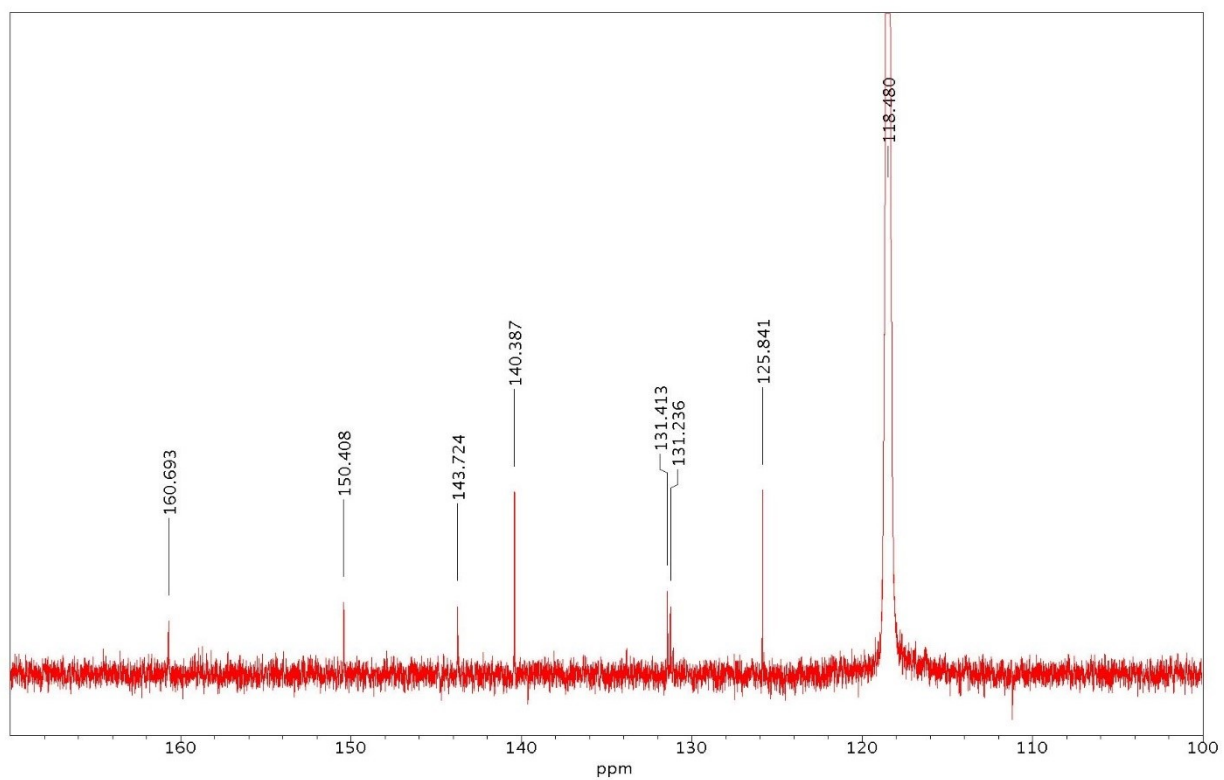

**Fig. S7.** The  $^1\text{H}$ - $^{13}\text{C}$  HMBC spectrum of  $[\text{ZnI}_2(\text{L}^{4-})]$  complex in  $\text{CD}_3\text{CN}$  (at  $25^\circ\text{C}$ ). The  $^1\text{H}$  and  $^{13}\text{C}$  NMR spectra of the  $[\text{ZnI}_2(\text{L}^{4-})]$  complex are presented as projection spectra. The positions of the quaternary carbon atoms' signals: C2 (147.92 ppm), C1'(144.89 ppm), and C4' (96.65 ppm), which were not detected in the 1D  $^{13}\text{C}$  NMR spectrum, are marked by the red arrows.

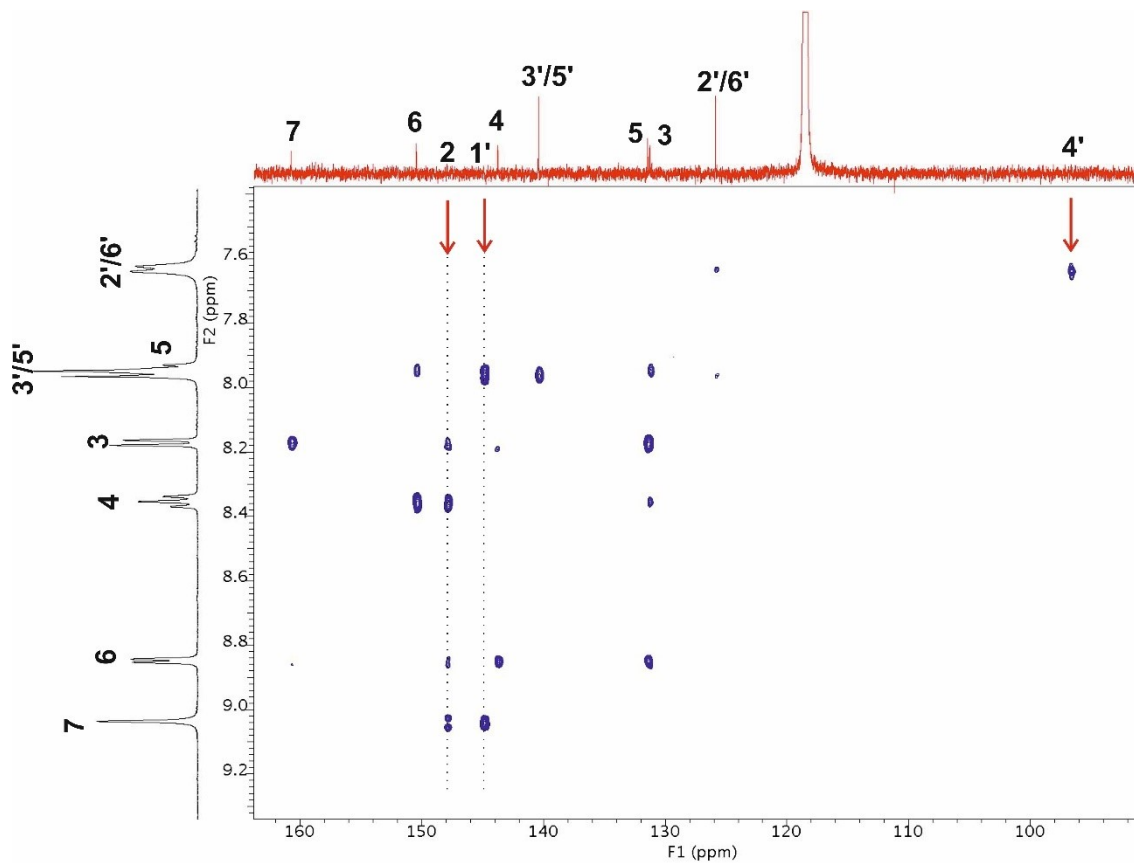

**Table S3.** The experimental  $^1\text{H}$  and  $^{13}\text{C}$  NMR chemical shifts  $\delta$  [ppm] for free  $\text{L}^{4-1}$  ligand and  $[\text{ZnI}_2(\text{L}^{4-1})]$  complex in  $\text{CD}_3\text{CN}$ , (temp. 25 °C, ref. to TMS, solvent:  $\delta$  ( $^1\text{H}$ ) 1.941 ppm,  $\delta$  ( $^{13}\text{C}$ ) 1.51 ppm, 118.48 ppm).

| Atom labeling | $\text{L}^{4-1}$ ligand                                   |                              |                                                | $[\text{ZnI}_2(\text{L}^{4-1})]$ complex                  |                              |                                      |
|---------------|-----------------------------------------------------------|------------------------------|------------------------------------------------|-----------------------------------------------------------|------------------------------|--------------------------------------|
|               | $\delta$ ( $^1\text{H}$ )*                                | $\delta$ ( $^{13}\text{C}$ ) | $^1\text{H}$ - $^{13}\text{C}$ HMBC#           | $\delta$ ( $^1\text{H}$ )*                                | $\delta$ ( $^{13}\text{C}$ ) | $^1\text{H}$ - $^{13}\text{C}$ HMBC# |
| 2             | -                                                         | 155.58                       | -                                              | -                                                         | 147.92 <sup>§</sup>          | -                                    |
| 3             | 8.153 (1H, <i>d</i> , $J_{\text{HH}}=7.9$ Hz)             | 122.48                       | H3 $\rightarrow$ C7, C5, C2                    | 8.168 (1H, <i>d</i> , $J_{\text{HH}}=7.8$ Hz)             | 131.24                       | H3 $\rightarrow$ C7, C5, C2          |
| 4             | 7.882 (1H, <i>ddd</i> , $J_{\text{HH}}=7.7, 7.7, 1.8$ Hz) | 138.07                       | H4 $\rightarrow$ C6, C2                        | 8.351 (1H, <i>ddd</i> , $J_{\text{HH}}=7.8, 7.8, 1.4$ Hz) | 143.72                       | H4 $\rightarrow$ C6, C2, C3          |
| 5             | 7.451 (1H, <i>ddd</i> , $J_{\text{HH}}=7.5, 4.8, 1.3$ Hz) | 126.74                       | H5 $\rightarrow$ C6, C3                        | 7.940 (1H) overlapping signal                             | 131.41                       | H5 $\rightarrow$ C6, C3              |
| 6             | 8.695 (1H, <i>d</i> , $J_{\text{HH}}=4.8$ Hz)             | 151.01                       | H6 $\rightarrow$ C2, C4, C5                    | 8.845 (1H, <i>d</i> , $J_{\text{HH}}=5.2$ Hz)             | 150.41                       | H6 $\rightarrow$ C4, C5, C2          |
| 7             | 8.557 (1H, <i>s</i> )                                     | 163.02                       | H7 $\rightarrow$ C2, C1', C3                   | 9.034 (1H, <i>s</i> )                                     | 160.69                       | H7 $\rightarrow$ C2, C1'             |
| 1'            | -                                                         | 152.03                       | -                                              | -                                                         | 144.89 <sup>§</sup>          | -                                    |
| 2'/6'         | 7.086 (2H, <i>d</i> , $J_{\text{HH}}=8.6$ Hz)             | 124.49                       | H2'/H6' $\rightarrow$ C4', C2'/6', C3'/5', C1' | 7.629 (2H, <i>d</i> , $J_{\text{HH}}=8.3$ Hz)             | 125.84                       | H2'/H6' $\rightarrow$ C4', C2'/6'    |
| 3'/5'         | 7.769 (2H, <i>d</i> , $J_{\text{HH}}=8.6$ Hz)             | 139.49                       | H3'/H5' $\rightarrow$ C1', C3'/5', C4', C2'/6' | 7.955 (2H) overlapping signal                             | 140.39                       | H3'/H5' $\rightarrow$ C1', C3'/5'    |
| 4'            | -                                                         | 91.75                        | -                                              | -                                                         | 96.65 <sup>§</sup>           | -                                    |

\*in brackets (multiplicity, number of protons, proton-proton coupling constants  $J_{\text{HH}}$  [Hz]);

# the heteronuclear multiple bond diagnostic correlation between the given carbon atoms and the showing proton(s) are presented;

<sup>§</sup> chemical shifts of quaternary carbon atoms signals were detected in  $^1\text{H}$ - $^{13}\text{C}$  HMBC spectrum.

**Fig. S8.** XANES spectra of the  $[\text{ZnI}_2(\text{L}^{4-1})]$  complex registered in solid state (black line, no offset) and in various solvents: DMPU (brown line, offset 0.2),  $\text{CH}_2\text{Cl}_2$  (purple, offset 0.4), acetonitrile (blue line, offset 1.0), methanol (orange line, offset 1.3), water (green line, offset 1.6), and DMSO (red line offset 2.0).

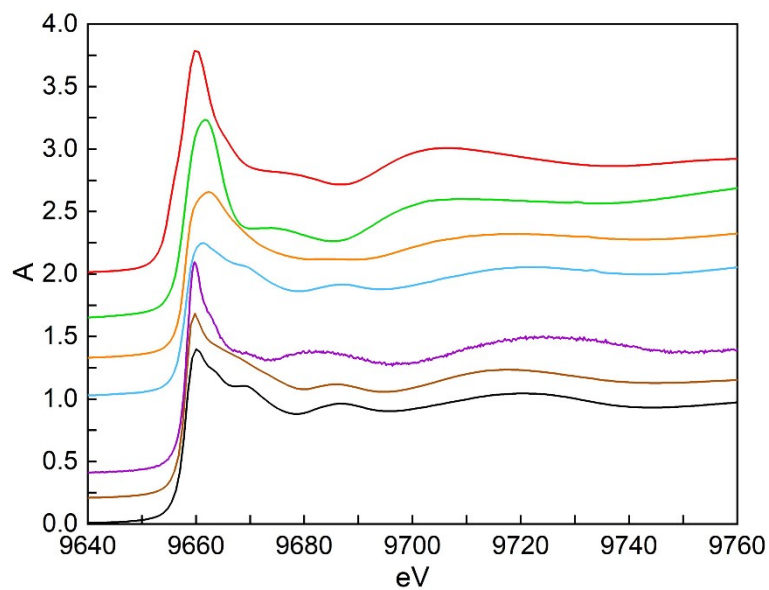

**Table S4.** MICs/MBC values (mg/L) and zone diameters of bacterial growth inhibition (mm) \* obtained for test compounds and ciprofloxacin for reference strains.

| Compound                               | <i>E. coli</i><br>ATCC25922 |                          | <i>P. aeruginosa</i><br>ATCC27853 |                          | <i>S. aureus</i><br>ATCC29213 |                          | <i>S. aureus</i><br>ATCC6538 |                          | <i>E. faecalis</i><br>ATCC29212 |                          |
|----------------------------------------|-----------------------------|--------------------------|-----------------------------------|--------------------------|-------------------------------|--------------------------|------------------------------|--------------------------|---------------------------------|--------------------------|
|                                        | MIC<br>(mg/L)               | Zone<br>diameter<br>(mm) | MIC<br>(mg/L)                     | Zone<br>diameter<br>(mm) | MIC<br>(mg/L)                 | Zone<br>diameter<br>(mm) | MIC<br>(mg/L)                | Zone<br>diameter<br>(mm) | MIC<br>(mg/L)                   | Zone<br>diameter<br>(mm) |
| ZnCl <sub>2</sub>                      | 512                         | ND                       | >512                              | ND                       | 256                           | ND                       | 512                          | ND                       | 256                             | ND                       |
| ZnI <sub>2</sub>                       | 512                         | ND                       | >512                              | ND                       | 512                           | ND                       | 512                          | ND                       | 512                             | ND                       |
| L <sup>4+</sup>                        | >512                        | 6                        | >512                              | 6                        | >512                          | 6                        | >512                         | 6                        | >512                            | 6                        |
| [ZnCl <sub>2</sub> (L <sup>4+</sup> )] | 512                         | 6                        | >512                              | 6                        | >512                          | 6                        | >512                         | 6                        | >512                            | 6                        |
| [ZnI <sub>2</sub> (L <sup>4+</sup> )]  | 512                         | 6                        | >512                              | 6                        | >512                          | 6                        | >512                         | 6                        | >512                            | 6                        |
| Ciprofloxacin                          | <0,5                        | 35                       | <0,5                              | 32                       | <0,5                          | 25                       | <0,5                         | 25                       | 1                               | 23                       |

\*ND: No data available.
